# Supplementary material for: Condensation of Rubisco into a proto-pyrenoid in higher plant chloroplasts
Source: PubMed Central journal article supplement (PMC7726157; doi:10.1038/s41467-020-20132-0), 2020-12-09
Supplement: 41467_2020_20132_MOESM4_ESM.pdf [file 41467_2020_20132_MOESM4_ESM.pdf]

## **Description of Additional Supplementary Files**

Supplementary Movie 1

Reconstruction of SIM image data showing the EPYC1-dGFP 25 condensates inside chloroplasts in Arabidopsis.
